# Supplementary material for: Photogeologic Map of the Perseverance Rover Field Site in Jezero Crater Constructed by the Mars 2020 Science Team
Source: Springer Nature journal article supplement (doi:10.1007/s11214-020-00739-x), 2020-11-03
Supplement: 11214_2020_739_MOESM1_ESM.pdf [file 11214_2020_739_MOESM1_ESM.pdf]

Article Title: Photogeologic Map of the Perseverance Rover Field Site in Jezero Crater  
Constructed by the Mars 2020 Science Team

Journal: Space Science Reviews

Kathryn M. Stack (0000-0003-3444-6695)<sup>1</sup>, Nathan R. Williams<sup>1</sup>, Fred Calef III (0000-0002-5132-3980)<sup>1</sup>, Vivian Sun (0000-0003-1480-7369)<sup>1</sup>, Kenneth H. Williford (0000-0003-0633-408X)<sup>1</sup>, Kenneth A. Farley (0000-0002-7846-7546)<sup>2</sup>, Sigurd Eide<sup>3</sup>, David Flannery (0000-0001-8982-496X)<sup>4</sup>, Cory Hughes (0000-0002-7061-1443)<sup>5</sup>, Samantha R. Jacob (0000-0001-9950-1486)<sup>6</sup>, Linda C. Kah (0000-0001-7172-2033)<sup>7</sup>, Forrest Meyen (0000-0002-0140-6411)<sup>8</sup>, Antonio Molina (0000-0002-5038-2022)<sup>9</sup>, Cathy Quantin Nataf<sup>10</sup>, Melissa Rice (0000-0002-8370-4139)<sup>4</sup>, Patrick Russell<sup>11</sup>, Eva Scheller (0000-0002-9981-5802)<sup>2</sup>, Christina H. Seeger<sup>5</sup>, William J. Abbey<sup>1</sup>, Jacob B. Adler (0000-0002-4722-2909)<sup>12</sup>, Hans Amundsen<sup>13</sup>, Ryan B. Anderson (0000-0003-4465-2871)<sup>14</sup>, Stanley M. Angel (0000-0002-0328-0568)<sup>15</sup>, Gorka Arana (0000-0001-7854-855X)<sup>16</sup>, James Atkins<sup>7</sup>, Megan Barrington<sup>17</sup>, Tor Berger<sup>18</sup>, Rose Borden (0000-0002-2908-598X)<sup>7</sup>, Beau Boring<sup>7</sup>, Adrian Brown<sup>19</sup>, Brandi L. Carrier (0000-0001-9943-7138)<sup>1</sup>, Pamela Conrad (0000-0001-5724-3343)<sup>20</sup>, Henning Dypvik<sup>2</sup>, Sarah A. Fagents (0000-0002-3943-3335)<sup>21</sup>, Zachary E. Gallegos<sup>22</sup>, Brad Garczynski<sup>23</sup>, Keenan Golder (0000-0002-4968-2239)<sup>7</sup>, Felipe Gomez (0000-0001-9977-7060)<sup>9</sup>, Yulia Goreva<sup>1</sup>, Sanjeev Gupta<sup>24</sup>, Svein-Erik Hamran<sup>3</sup>, Taryn Hicks<sup>7</sup>, Eric D. Hinterman<sup>25</sup>, Briony N. Horgan (0000-0001-6314-9724)<sup>23</sup>, Joel Hurowitz<sup>26</sup>, Jeffrey R. Johnson<sup>27</sup>, Jeremie Lasue (0000-0001-9082-4457)<sup>28</sup>, Rachel E. Kronyak<sup>1</sup>, Yang Liu<sup>1</sup>, Juan Manuel Madariaga (0000-0002-1685-6335)<sup>16</sup>, Nicolas Mangold<sup>29</sup>, John McClean<sup>24</sup>, Noah Miklusicak<sup>7</sup>, Daniel Nunes (0000-0002-0937-7176)<sup>1</sup>, Corrine Rojas<sup>6</sup>, Kirby Runyon (0000-0001-6361-6548)<sup>27</sup>, Nicole Schmitz<sup>31</sup>, Noel Scudder<sup>23</sup>, Emily Shaver<sup>7</sup>, Jason SooHoo (0000-0003-1938-0720)<sup>25</sup>, Russell Spaulding<sup>7</sup>, Evan Stanish<sup>31</sup>, Leslie K. Tamppari<sup>1</sup>, Michael M. Tice<sup>32</sup>, Nathalie Turenne<sup>31</sup>, Peter A. Willis (0000-0001-5394-1101)<sup>1</sup>, R. Aileen Yingst (0000-0002-0628-4265)<sup>33</sup>

<sup>1</sup>Jet Propulsion Laboratory, California Institute of Technology, 4800 Oak Grove Drive, Pasadena, CA 91109

<sup>2</sup>California Institute of Technology, Pasadena, CA

<sup>3</sup>University of Oslo, Oslo, Norway

<sup>4</sup>Queensland University of Technology, Brisbane, Queensland, Australia

<sup>5</sup>Western Washington University, Bellingham, WA

<sup>6</sup>Arizona State University, Tempe, Arizona

<sup>7</sup>University of Tennessee-Knoxville, Knoxville, TN

<sup>8</sup>Draper Laboratory, Cambridge, MA

<sup>9</sup>Centro de Astrobiología, CAB (INTA, CSIC), Madrid, Spain

<sup>10</sup>University of Lyon, Lyon, France

<sup>11</sup>University of California Los Angeles, Los Angeles, CA

<sup>12</sup>Johns Hopkins University, Baltimore, MD

<sup>13</sup>Earth and Planetary Exploration Services, Berlin, Germany

<sup>14</sup>USGS-Flagstaff, Flagstaff, AZ

<sup>15</sup>University of South Carolina, Columbia, SC

<sup>16</sup>University of the Basque Country (UPV/EHU), Leioa, Bizkaia, Spain

<sup>17</sup>Plancius Research, Severna Park, MD

<sup>18</sup>Carnegie Institution for Science, Washington, D.C.

<sup>19</sup>Cornell University, Ithaca, NY

<sup>20</sup>Forsvarets forskningsinstitutt, Kjeller, Norway

<sup>21</sup>University of Hawaii at Manoa, Honolulu, HI

<sup>22</sup>University of New Mexico, Albuquerque, NM

<sup>23</sup>Purdue University, West Lafayette, IN

<sup>24</sup>Imperial College of London

<sup>25</sup>Massachusetts Institute of Technology, Cambridge, MA

<sup>26</sup>State University of New York- Stony Brook, Stony Brook, NY

<sup>27</sup>Johns Hopkins Applied Physics Laboratory, Laurel, MD

<sup>28</sup>Institut de Recherche en Astrophysique et Planetologie (IRAP), Université de Toulouse, Paul Sabatier, Toulouse, France

<sup>29</sup>Laboratoire Planétologie et Géodynamique, UMR 6112, CNRS, Université de Nantes, Nantes, France

<sup>30</sup>Deutsches Zentrum fuer Luft- und Raumfahrt E.V., Cologne, Germany

<sup>31</sup>University of Winnipeg, Winnipeg, Manitoba, CA

<sup>32</sup>Texas A&M University, College Station, TX

<sup>33</sup>Planetary Science Institute, Tucson, AZ

Corresponding author:

Kathryn M. Stack

[kathryn.m.stack@jpl.nasa.gov](mailto:kathryn.m.stack@jpl.nasa.gov)

[ORCID 0000-0003-3444-6695](https://orcid.org/0000-0003-3444-6695)

Jet Propulsion Laboratory

M/S 321-400

4800 Oak Grove Drive

Pasadena, CA 91109

Copyright 2020. All rights reserved.

---

High Resolution Imaging Science Experiment (HiRISE) image pairs used to construct the HiRISE basemap and HiRISE digital terrain model:

ESP\_045994\_1985      ESP\_046060\_1985

PSP\_002387\_1985      PSP\_003798\_1985

ESP\_037396\_1985      ESP\_042315\_1985

ESP\_048842\_1985      ESP\_048908\_1985

ESP\_037818\_1990      ESP\_037330\_1990

ESP\_036618\_1985      ESP\_037119\_1985

The HiRISE basemap used in this study can be accessed here:

[https://planetarymaps.usgs.gov/mosaic/mars2020\\_trn/HiRISE/JEZ\\_hirise\\_soc\\_006\\_orthoMosaic\\_25cm\\_Eqc\\_latTs0\\_lon0\\_first.tif](https://planetarymaps.usgs.gov/mosaic/mars2020_trn/HiRISE/JEZ_hirise_soc_006_orthoMosaic_25cm_Eqc_latTs0_lon0_first.tif)

The HiRISE digital terrain model mosaic used in this study can be accessed here:

[https://planetarymaps.usgs.gov/mosaic/mars2020\\_trn/HiRISE/JEZ\\_hirise\\_soc\\_006\\_DTM\\_MOL\\_Atography\\_DeltaGeoid\\_1m\\_Eqc\\_latTs0\\_lon0\\_blend40.tif](https://planetarymaps.usgs.gov/mosaic/mars2020_trn/HiRISE/JEZ_hirise_soc_006_DTM_MOL_Atography_DeltaGeoid_1m_Eqc_latTs0_lon0_blend40.tif)
